# Supplementary material for: Interaction between aromatic rings as organizing tools and semi-coordination in Cu(ii) compounds
Source: Royal Society of Chemistry journal article supplement (doi:10.1039/c7ce00871f), 2017-01-01
Supplement: c7ce00871f1.pdf [file c7ce00871f1.pdf]

Supplementary material.

**Table S1.** Structural geometric parameters of compounds **1**, **2** and **3**.

| Compound | Center | $\tau^a$ | Angle $^b$ | Distance $^c$ |
|----------|--------|----------|------------|---------------|
| <b>1</b> | Cu1    | 2.80     | 79.00      | 0.2521        |
| <b>2</b> | Cu     | 18.7     | 85.34      | -0.1967       |
| <b>3</b> | Cu1    | 23.9     | 78.00      | -0.0806       |
|          | Cu2    | 14.3     | 83.95      | -0.1628       |

$^a \tau$  (%) The ideal value for Square pyramid ( $C_{4v}$  symmetry) is 0 and for a Trigonal bipyramid ( $D_{3h}$  symmetry) is 100.

$^b$  Dihedral angle between the equatorial plane around Cu(II) and the apex of the pyramid ( $^\circ$ ).

$^c$  Perpendicular distance between the basal plane and Cu(II) ( $\text{Å}$ ).

Table S2. Hydrogen Bonds ( $\text{Å}$ ,  $^\circ$ ), for **1**

| D-H...A           | d(D-H) | d(H...A) | d(D...A) | $\angle(\text{DHA})$ | Symm*              |
|-------------------|--------|----------|----------|----------------------|--------------------|
| C3" --H3"...O3    | 0.9300 | 2.2900   | 3.21(2)  | 171.00               | -x,y,1/2-z         |
| C5 --H5...O5      | 0.9300 | 2.4000   | 3.18(3)  | 141.00               | 1/2-x,-1/2+y,1/2-z |
| C5'-- H5'... O6   | 0.9300 | 2.5200   | 3.28(2)  | 139.00               | -x,y,1/2-z         |
| C6 -- H6 ... O1   | 0.9300 | 2.5600   | 3.03(1)  | 112.00               |                    |
| C6" -- H6" ... O2 | 0.9300 | 2.3000   | 3.12(1)  | 148.00               | -x,-y,-z           |

\* Symmetry transformations used to generate equivalent atoms:

Table S3 - Hydrogen Bonds (Å, °) for **3**

| D-H...A         | d(D-H) | d(H...A) | d(D...A)  | <(DHA) | Symm*              |
|-----------------|--------|----------|-----------|--------|--------------------|
| C11-- H11...F2  | 0.9300 | 2.4400   | 3.2396(2) | 144.00 | -1/2+x,1/2-y,1/2+z |
| C15-- H15...O9  | 0.9300 | 2.4000   | 3.2269(2) | 148.00 | -1+x,y,1+z         |
| C17-- H17...O5  | 0.9300 | 2.5000   | 3.3157(2) | 147.00 | -x,-y,2-z          |
| C20-- H20...O6  | 0.9300 | 2.4900   | 3.3858(2) | 161.00 | -x,-y,-z           |
| C22-- H22...O10 | 0.9300 | 2.5500   | 3.3426(2) | 144.00 | 3_656              |
| C26-- H26...O7  | 0.9300 | 2.5800   | 3.3124(2) | 136.00 | 1/2-x,-1/2+y,3/2-z |
| C31-- H31...O9  | 0.9300 | 2.5600   | 3.2216(2) | 128.00 | 3/2-x,-1/2+y,1/2-z |
| C38-- H38...O4  | 0.9300 | 2.5200   | 3.1131(2) | 122.00 | .                  |

\* Symmetry transformations used to generate equivalent atoms:

Table S4. Hydrogen bonds for **2** (Å , °).

| ...D-HA             | d(D-H) | ...d(HA) | ...d(DA) | <(DHA) | Symm*          |
|---------------------|--------|----------|----------|--------|----------------|
| O(5)-H(5A)...O(4)#2 | 0.85   | 2.13     | 2.848(6) | 142.2  | x+1,y+1,z      |
| O(5)-H(5A)...F(2)#3 | 0.85   | 2.59     | 3.145(7) | 124.4  | x+1,y,z        |
| O(5)-H(5B)...O(6)#4 | 0.85   | 1.93     | 2.782(7) | 179.2  | -x+1,-y+1,-z+1 |
| O(6)-H(6A)...O(2)   | 0.85   | 2.22     | 3.068(5) | 174.6  |                |
| O(6)-H(6B)...O(5)   | 0.85   | 1.95     | 2.805(7) | 178.9  |                |
| O(7)-H(7A)...O(1)#5 | 0.85   | 2.24     | 3.085(4) | 175.9  | x,y+1,z        |
| O(7)-H(7B)...O(6)#4 | 0.85   | 1.95     | 2.805(6) | 178.2  | -x+1,-y+1,-z+1 |

\* Symmetry transformations used to generate equivalent atoms:

### Table SXX. Analysis of Short Ring-Interactions

- Cg(I) = Plane number I (= ring number in () above)
- Alpha = Dihedral Angle between Planes I and J (Deg)
- Beta = Angle Cg(I)-->Cg(J) or Cg(I)-->Me vector and normal to plane I (Deg)
- Gamma = Angle Cg(I)-->Cg(J) vector and normal to plane J (Deg)
- Cg-Cg = Distance between ring Centroids (Ang.)
- CgI\_Perp = Perpendicular distance of Cg(I) on ring J (Ang.)
- CgJ\_Perp = Perpendicular distance of Cg(J) on ring I (Ang.)
- Slippage = Distance between Cg(I) and Perpendicular Projection of Cg(J) on Ring I (Ang).

#### Compound 1

| Cg(I) - Cg(J) | [ ARU(J)]  | Cg-Cg    | Alpha  | Beta | Gamma | CgI_Perp | CgJ_Perp |
|---------------|------------|----------|--------|------|-------|----------|----------|
| Cg(1)- Cg(5)  | -x,y,1/2-z | 3.615(4) | 2.8(3) | 15.6 | 15.6  | 3.482(3) | 3.481(3) |
| Cg(1)- Cg(2)  | -x,y,1/2-z | 3.984(5) | 2.6(3) | 29.0 | 30.8  | 3.420(3) | 3.485(3) |
| Cg(2)- Cg(2)  | -x,y,1/2-z | 3.455(4) | 1.9(3) | 2.7  | 2.7   | 3.450(3) | 3.451(3) |
| Cg(4)- Cg(4)  | -x,y,1/2-z | 3.877(6) | 1.5(4) | 25.2 | 25.2  | 3.508(3) | 3.509(3) |

- (1) Cu(1)-N(1) -C(2) -C(2')-N(1')
- (2) Cu(1)-N(1')-C(6')-C(2'')-N(1'')
- (4) N(1')-C(2')-C(3')-C(4')-C(5')-C(6')
- (5) N(1'')-C(2'')-C(3'')-C(4'')-C(5'')-C(6'')

Compound 2

| Cg(I) - Cg(J) | [ ARU(J)]  | Cg-Cg      | Alpha    | Beta | Gamma | CgI_Perp    | CgJ_Perp    |
|---------------|------------|------------|----------|------|-------|-------------|-------------|
| Cg(4) - Cg(5) | -x,-y,2-z  | 3.655(2)   | 6.64(17) | 16.6 | 22.6  | -3.3758(14) | -3.5026(15) |
| Cg(4) - Cg(7) | x,y,z      | 3.7019(19) | 6.63(16) | 30.7 | 24.2  | -3.3767(14) | 3.1827(13)  |
| Cg(5) - Cg(6) | 1-x,-y,2-z | 3.7910(19) | 4.98(16) | 25.9 | 22.2  | 3.5109(14)  | 3.4100(13)  |

- (4) N(1) - C(2) - C(3) - C(4) - C(5) - C(6)
- (5) N(7) - C(8) - C(9) - C(10) - C(11) - C(12)
- (6) N(13) - C(14) - C(15) - C(16) - C(17) - C(18)
- (7) C(19) - C(20) - C(21) - C(22) - C(23) - C(24)

**Table SX.** interactions between rings in **3**

| Cg(I)  | Cg(J)  | [ ARU(J)]  | Cg-Cg    | Alpha  | Beta | Gamma | Cgl_Perp    | CgJ_Perp    |
|--------|--------|------------|----------|--------|------|-------|-------------|-------------|
| Cg(6)  | Cg(9)  | 1-x,-y,2-z | 3.587(2) | 7.0(2) | 13.1 | 9.4   | 3.5388(17)  | 3.4933(18)  |
| Cg(8)  | Cg(12) | 1-x,-y,2-z | 3.571(2) | 9.6(2) | 13.3 | 12.5  | 3.4863(18)  | 3.4751(16)  |
| Cg(10) | Cg(12) | 1-x,-y,1-z | 3.814(2) | 8.9(2) | 11.8 | 14.3  | -3.6953(19) | -3.7336(16) |

( 6) N(1) - C(9) - C(10) - C(11) - C(12) - C(13)

( 8) N(3) - C(19) - C(20) - C(21) - C(22) - C(23)

( 9) N(4) - C(24) - C(25) - C(26) - C(27) - C(28)

(10) N(5) - C(29) - C(30) - C(31) - C(32) - C(33)

(12) C(1) - C(2) - C(3) - C(4) - C(5) - C(6)
